# Supplementary material for: Core@shell nanostructured Au-d@NimPtm for electrochemical oxygen reduction reaction: effect of the core size and shell thickness
Source: Royal Society of Chemistry journal article supplement (doi:10.1039/c9cy01056d), 2019-01-01
Supplement: c9cy01056d1.pdf [file c9cy01056d1.pdf]

## Supplementary Information

### **Oxygen Reduction Reaction on Core@Shell Nanostructured Au-*d*@Ni<sub>m</sub>Pt<sub>m</sub>: Effect of Core Size and Shell Thickness**

Min Zhang,<sup>a</sup> Shu Miao<sup>b</sup> and Bo-Qing Xu<sup>\*a</sup>

<sup>a</sup>Innovative Catalysis Program, Key Lab of Organic Optoelectronics & Molecular Engineering, Department of Chemistry, Tsinghua University, Beijing 100084, China.

<sup>b</sup>State Key Laboratory of Catalysis, Dalian Institute of Chemical Physics, Chinese Academy of Sciences, Dalian 116023, China.

\* Corresponding author: Prof. Bo-Qing Xu

Department of Chemistry

Tsinghua University

Beijing, 100084, China

Tel.: +86 10 6279 2122

Fax: +86 10 6277 1149

E-mail: [bxqu@mail.tsinghua.edu.cn](mailto:bqxu@mail.tsinghua.edu.cn)

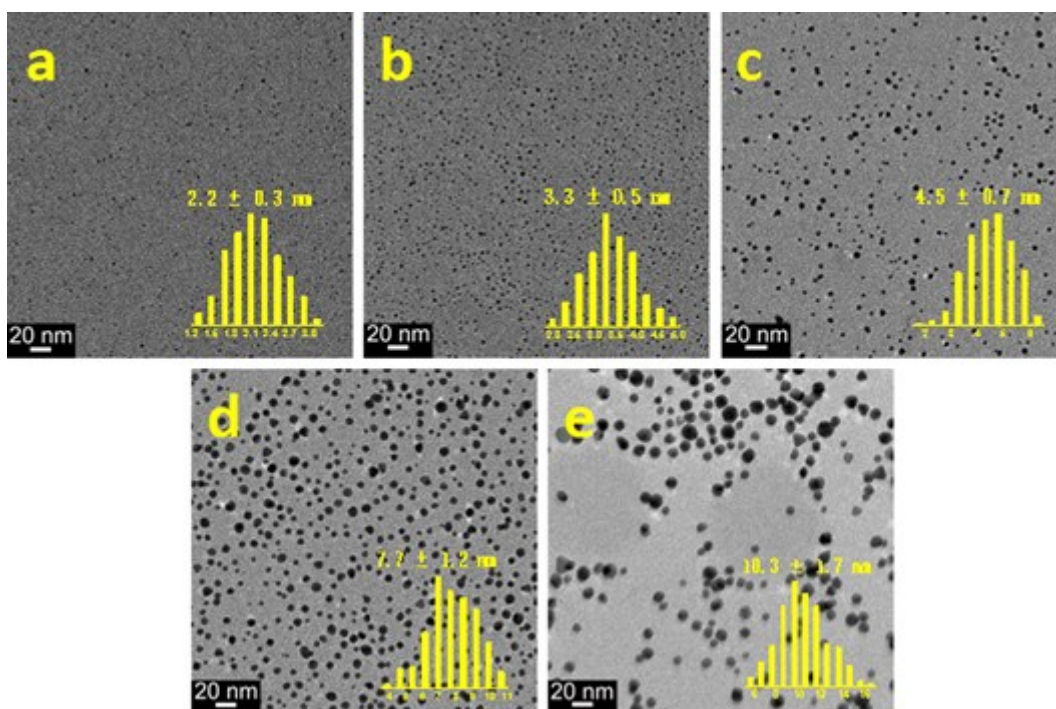

**Figure S1.** TEM images of (a)  $(\text{Pt}_{0.15}^{\text{Au-2.2}})@\text{Ni}_2\text{Pt}_2/\text{C}$ , and (b)  $(\text{Pt}_{0.25}^{\text{Au-2.2}})@\text{Ni}_2\text{Pt}_2/\text{C}$ .

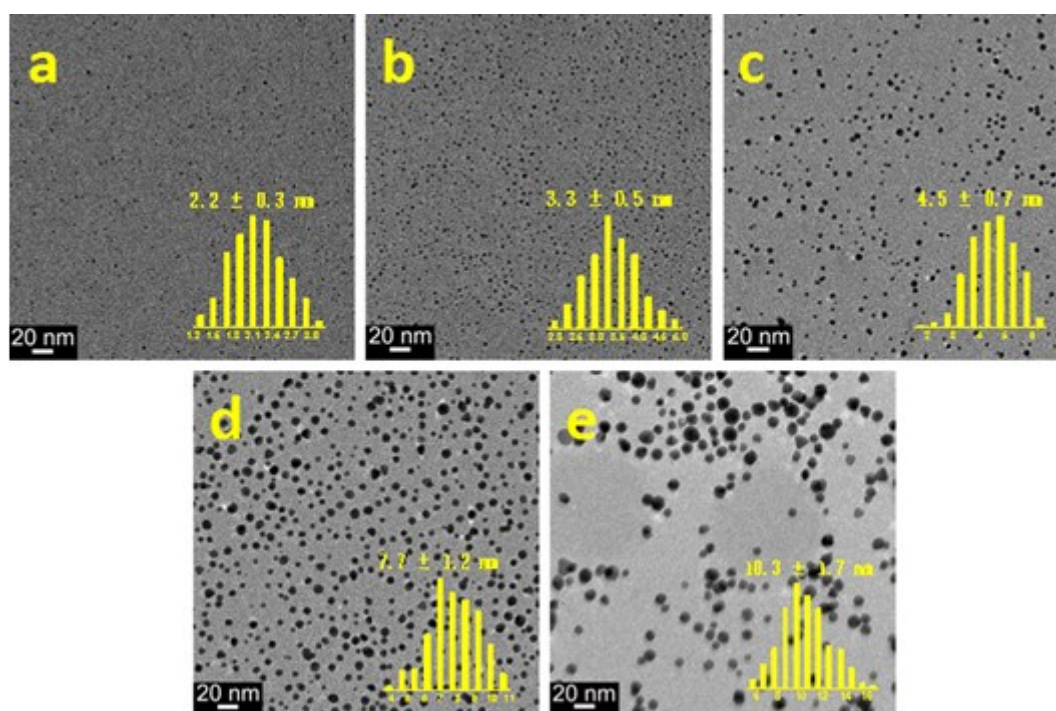

**Figure S2.** TEM images and their measured size histograms in diameter of Au-*d* NPs: (a)  $d = 2.2$ , (b)  $d = 3.3$ , (c)  $d = 4.5$ , (d)  $d = 7.7$ , (e)  $d = 10.3$ .

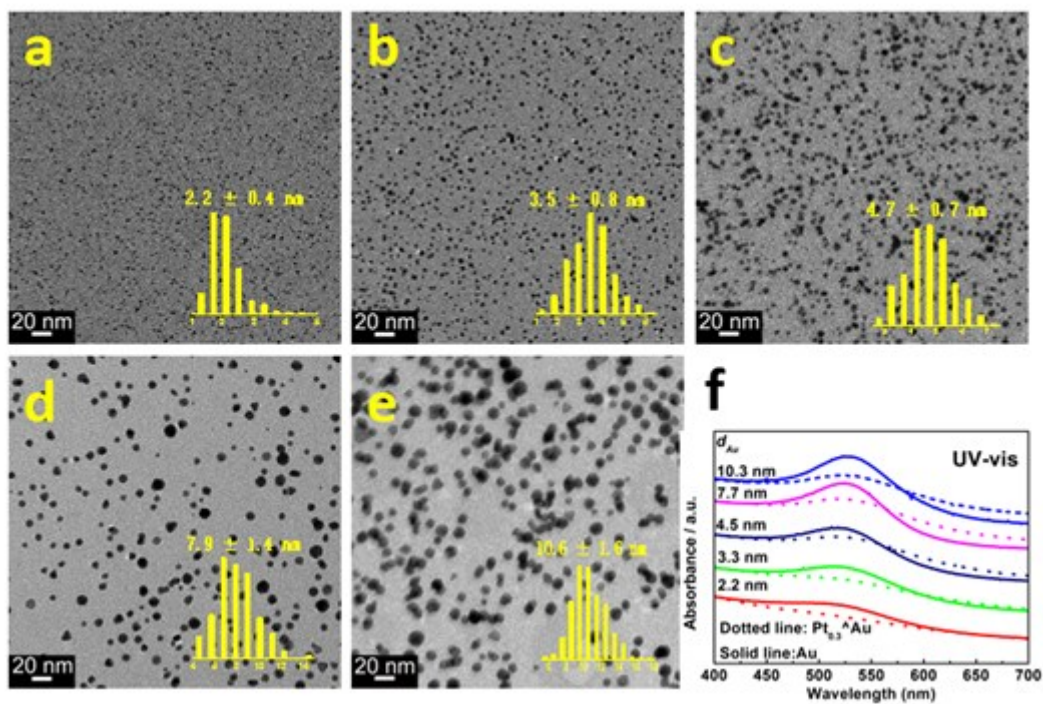

**Figure S3.** (a)  $\text{Pt}_{0.3}\text{Au}-2.2$ , (b)  $\text{Pt}_{0.3}\text{Au}-3.3$ , (c)  $\text{Pt}_{0.3}\text{Au}-4.5$ , (d)  $\text{Pt}_{0.3}\text{Au}-7.7$ , (e)  $\text{Pt}_{0.3}\text{Au}-10.3$ . (f) UV-vis spectra of Au-*d* NPs and  $\text{Pt}_{0.3}\text{Au}-d$  NPs.

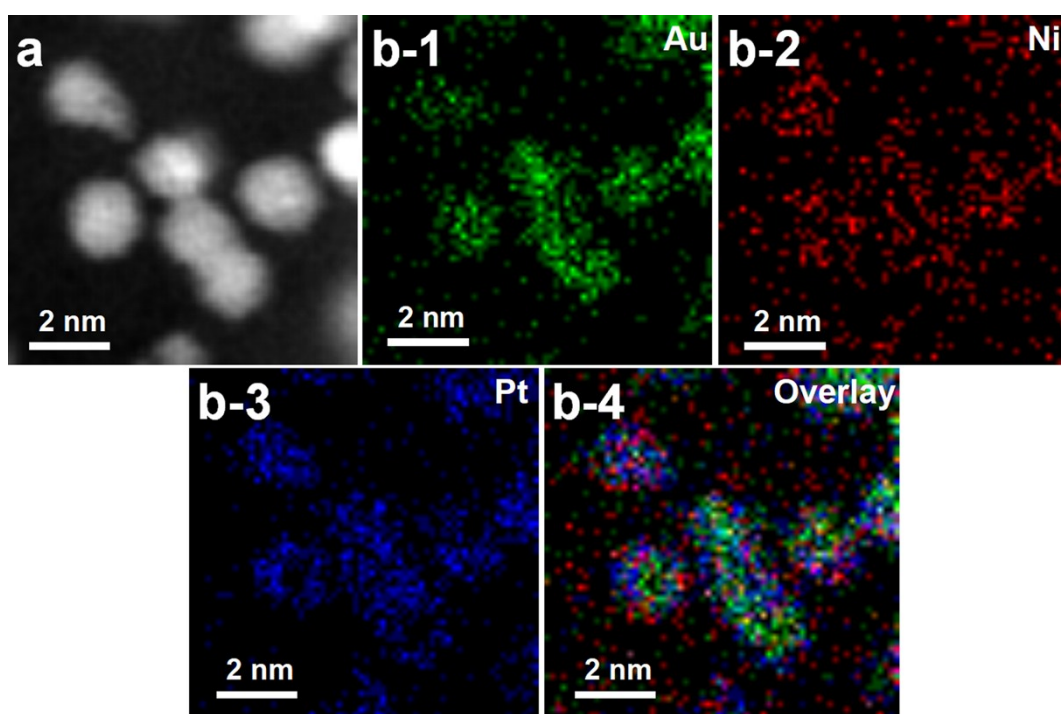

**Figure S4.** Structure and elemental analysis of as-prepared Au-2.2@Ni<sub>0.5</sub>Pt<sub>0.5</sub> NPs. (a) HAADF-STEM images and (b) elemental distribution analysis, elemental mapping of Au (green), Ni (red), Pt (blue) and their overlay.



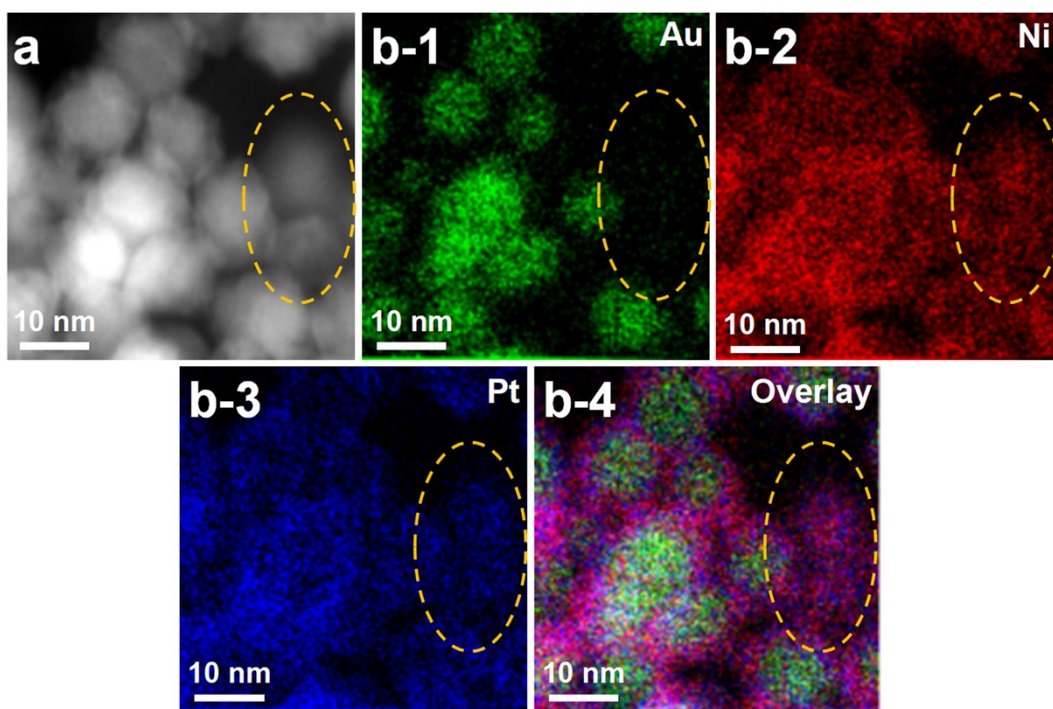

**Figure S5.** Structure and elemental analysis of as-prepared Au-10.3@Ni<sub>2</sub>Pt<sub>2</sub> NPs. (a) HAADF-STEM images and (b) elemental distribution analysis, elemental mapping of Au (green), Ni (red), Pt (blue) and their overlay. The NPs without Au core were marked in the yellow ellipses.

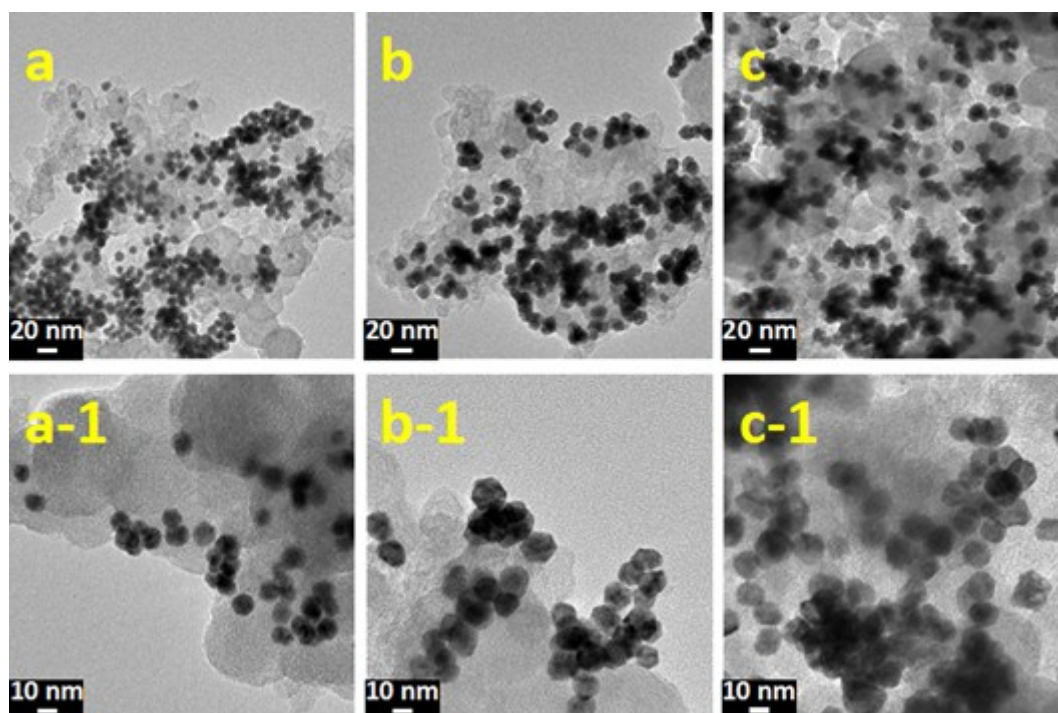

**Figure S6.** TEM images of Au-7.7@Ni<sub>*m*</sub>Pt<sub>*m*</sub>/C samples: (a) *m*=1, (b) *m*=4, (c) *m*=6.

## 1. XRD characterizations

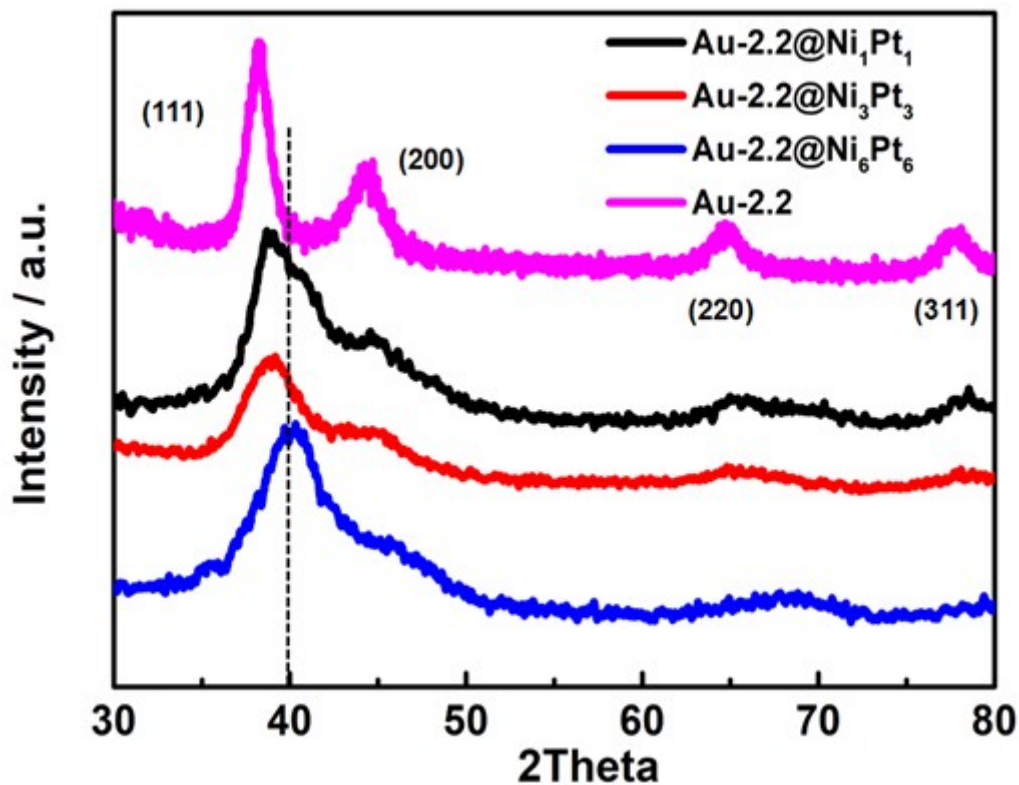

Figure S7. XRD patterns for Au-2.2@Ni<sub>1</sub>Pt<sub>1</sub>/C, Au-2.2@Ni<sub>3</sub>Pt<sub>3</sub>/C, Au-2.2@Ni<sub>6</sub>Pt<sub>6</sub>/C, Au-2.2/C and PtNi/C.

## 2. Activity of Au-7.7@Ni<sub>m</sub>Pt<sub>m</sub>/C samples

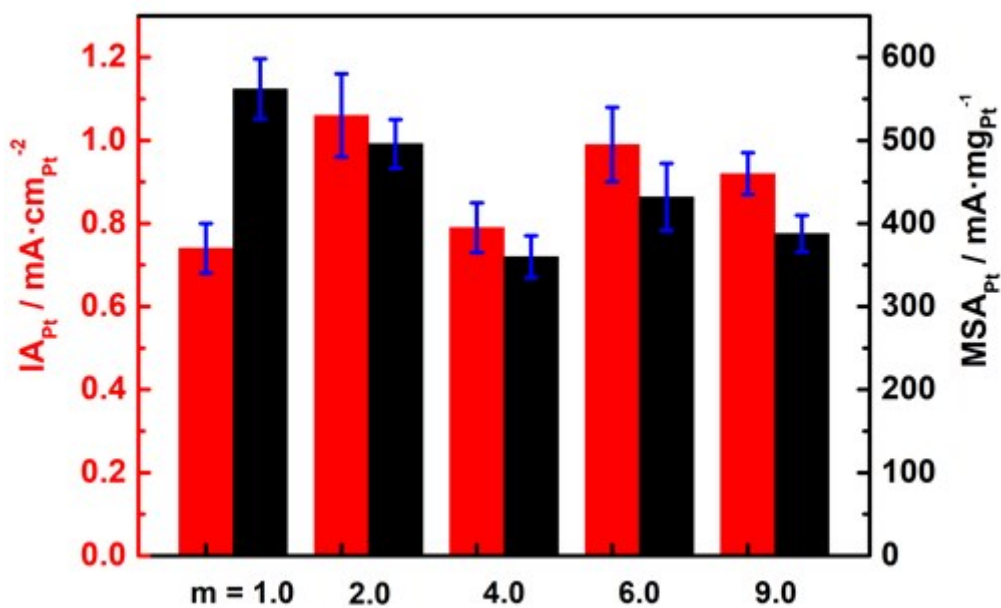

Figure S8. (a) MSA<sub>Pt</sub> and IA<sub>Pt</sub> data of Au-7.7@Ni<sub>m</sub>Pt<sub>m</sub>/C samples ( $m=1, 2, 4, 6, 9$ ) at 0.9 V.

### 3. Detailed information for Au-*d*@Ni<sub>*m*</sub>Pt<sub>*m*</sub>/C samples

**Table S1.** Electrochemical properties of the Au-*d*@Ni<sub>*m*</sub>Pt<sub>*m*</sub>/C samples.

| Sample                                     | EAS <sub>Pt</sub><br>(m <sup>2</sup> ·g <sub>Pt</sub> <sup>-1</sup> ) | Half-wave Potentials<br>(V) | IA <sub>Pt</sub><br>(mA·cm <sub>Pt</sub> <sup>-2</sup> ) | MSA <sub>Pt</sub><br>(mA·mg <sub>Pt</sub> <sup>-1</sup> ) |
|--------------------------------------------|-----------------------------------------------------------------------|-----------------------------|----------------------------------------------------------|-----------------------------------------------------------|
| Au-2.2@Ni <sub>0.5</sub> Pt <sub>0.5</sub> | 102 (58)*                                                             | 0.86                        | 0.15 (0.1)*                                              | 157 (59)*                                                 |
| Au-2.2@Ni <sub>1</sub> Pt <sub>1</sub>     | 86                                                                    | 0.91                        | 0.37                                                     | 328                                                       |
| Au-2.2@Ni <sub>2</sub> Pt <sub>2</sub>     | 83                                                                    | 0.92                        | 0.51                                                     | 423                                                       |
| Au-2.2@Ni <sub>2.5</sub> Pt <sub>2.5</sub> | 81                                                                    | 0.92                        | 0.42                                                     | 346                                                       |
| Au-2.2@Ni <sub>3</sub> Pt <sub>3</sub>     | 78 (48)*                                                              | 0.91                        | 0.43 (0.31)*                                             | 330 (153)*                                                |
| Au-2.2@Ni <sub>6</sub> Pt <sub>6</sub>     | 57 (40)*                                                              | 0.91                        | 0.48 (0.45)*                                             | 278 (184)*                                                |
| Au-3.3@Ni <sub>2</sub> Pt <sub>2</sub>     | 71                                                                    | 0.91                        | 0.56                                                     | 402                                                       |
| Au-4.5@Ni <sub>2</sub> Pt <sub>2</sub>     | 61                                                                    | 0.91                        | 0.60                                                     | 363                                                       |
| Au-7.7@Ni <sub>2</sub> Pt <sub>2</sub>     | 47 (33)*                                                              | 0.93                        | 1.06 (0.98)*                                             | 496 (322)*                                                |
| Au-7.7@Ni <sub>1</sub> Pt <sub>1</sub>     | 76                                                                    | 0.93                        | 0.74                                                     | 562                                                       |
| Au-7.7@Ni <sub>4</sub> Pt <sub>4</sub>     | 45                                                                    | 0.93                        | 0.79                                                     | 360                                                       |
| Au-7.7@Ni <sub>6</sub> Pt <sub>6</sub>     | 44                                                                    | 0.94                        | 0.99                                                     | 432                                                       |
| Au-7.7@Ni <sub>9</sub> Pt <sub>9</sub>     | 42                                                                    | 0.93                        | 0.92                                                     | 388                                                       |
| Au-10.3@Ni <sub>2</sub> Pt <sub>2</sub>    | 36                                                                    | 0.92                        | 1.09                                                     | 392                                                       |
| Pt/C (E-TEK)                               | 76 (32)*                                                              | 0.88                        | 0.25 (0.17)*                                             | 189 (66)*                                                 |
| PtNi/C                                     | 39 (35)*                                                              | 0.92                        | 1.01 (0.37)*                                             | 389 (135)*                                                |

\* The numbers in the parentheses were obtained in the measurements after ADT.

**Table S2.** Detailed experimental parameters/conditions for the synthesis of Au NPs of different sizes

| Sample  | <i>d</i> <sub>seeds</sub> (nm) <sup>a</sup> | V <sub>seeds</sub> (ml) <sup>b</sup> | V <sub>HAuCl<sub>4</sub></sub> (ml) <sup>c</sup> | V <sub>AA</sub> (ml) <sup>d</sup> | D (nm) <sup>e</sup> |
|---------|---------------------------------------------|--------------------------------------|--------------------------------------------------|-----------------------------------|---------------------|
| Au-2.2  | -                                           | -                                    | 1.00                                             | -                                 | 2.2 ± 0.3           |
| Au-3.3  | 2.2                                         | 10.0                                 | 0.25                                             | 3.8                               | 3.3 ± 0.5           |
| Au-4.5  | 2.2                                         | 10.0                                 | 1.00                                             | 15.0                              | 4.5 ± 0.7           |
| Au-7.7  | 4.7                                         | 8.2                                  | 0.50                                             | 7.5                               | 7.7 ± 1.2           |
| Au-10.3 | 4.7                                         | 5.8                                  | 1.00                                             | 15.0                              | 10.3 ± 1.9          |

<sup>a</sup> Average size by diameter of Au seeds. <sup>b</sup> The concentration of Au was 1.0 × 10<sup>-3</sup> M. <sup>c</sup> The concentration of HAuCl<sub>4</sub> was 5.0 × 10<sup>-3</sup> M. <sup>d</sup> The concentration of ascorbic acid was 5.0 × 10<sup>-3</sup> M. <sup>e</sup> Average size by diameter of Au NPs.
